# Supplementary material for: Insulin resistance and chronic kidney disease progression, cardiovascular events, and death: findings from the chronic renal insufficiency cohort study
Source: Springer Nature journal article supplement (doi:10.1186/s12882-019-1220-6), 2019-02-20
Supplement: MOESM1 [file 16495140]

## Supplemental Material

### Data Collection Procedures

Systolic blood pressure was measured with the participant seated using a Tycos™ Classic hand aneroid cuff and sphygmomanometer. Glucose was detected using a coupled enzymatic method ([www.orthoclinical.com](http://www.orthoclinical.com)). Insulin and C-peptide were measured in EDTA plasma using radioimmunoassay ([www.millipore.com](http://www.millipore.com)). Hemoglobin A1c was analyzed in whole blood using a boronate affinity high-performance liquid chromatography (HPLC) method ([www.trinitybiotech.com](http://www.trinitybiotech.com)) for samples collected through February 2006, and an ion exchange HPLC method ([www.bio-rad.com](http://www.bio-rad.com)) for samples collected subsequently. A complete blood count was analyzed at each of the CRIC clinical sites using local clinical laboratories.

Serum creatinine was measured at the CRIC Central Laboratory by an enzymatic method ([www.orthoclinical.com](http://www.orthoclinical.com)) for samples collected through October 2008 and by the Jaffe method ([www.beckmancoulter.com](http://www.beckmancoulter.com)) thereafter, and standardized to isotope dilution mass spectrometry-traceable values.<sup>24;25</sup> Serum cystatin C was measured using a particle-enhanced immunonephelometric assay on the Siemens BN™ II System ([www.siemens.com](http://www.siemens.com)).

**Table S1. Multivariable-adjusted hazard ratios of atherosclerotic cardiovascular composite endpoints and all-cause mortality per 1 SD increase in HOMA-IR and other markers of carbohydrate metabolism among CRIC participants without diabetes at baseline, censored at ESRD for CVD and death outcomes**

|                                                                      | Model 1 |           | Model 2 |           | Model 3 |           |
|----------------------------------------------------------------------|---------|-----------|---------|-----------|---------|-----------|
|                                                                      | HR*     | 95% CI    | HR*     | 95% CI    | HR*     | 95% CI    |
| <i>Event: Composite Atherosclerotic CVD Endpoint (MI/PAD/stroke)</i> |         |           |         |           |         |           |
| HOMA-IR                                                              | 1.01    | 0.87-1.18 | 1.01    | 0.84-1.21 | 0.98    | 0.81-1.20 |
| Glucose                                                              | 1.08    | 0.93-1.25 | 1.12    | 0.95-1.31 | 1.13    | 0.96-1.35 |
| HbA1c                                                                | 1.31    | 1.14-1.51 | 1.31    | 1.34-1.53 | 1.25    | 1.06-1.47 |
| C-peptide                                                            | 1.16    | 0.99-1.35 | 1.08    | 0.88-1.32 | 1.06    | 0.85-1.31 |
| <i>Event: All-Cause Mortality</i>                                    |         |           |         |           |         |           |
| HOMA-IR                                                              | 0.91    | 0.80-1.04 | 0.95    | 0.82-1.10 | 0.92    | 0.78-1.07 |
| Glucose                                                              | 0.96    | 0.84-1.09 | 1.00    | 0.87-1.14 | 1.01    | 0.88-1.17 |
| HbA1c                                                                | 1.02    | 0.90-1.16 | 1.07    | 0.93-1.22 | 1.01    | 0.88-1.17 |
| C-peptide                                                            | 1.10    | 0.96-1.26 | 1.10    | 0.92-1.31 | 1.07    | 0.89-1.29 |

Abbreviations: CI – confidence interval; CRP – C-reactive protein; CVD – cardiovascular disease; ESRD – end-stage renal disease; HbA1c – glycosylated hemoglobin; HDL – high density lipoprotein; HOMA-IR – homeostasis model assessment insulin resistance; HR – hazard ratio; MI – myocardial infarction; PAD – peripheral arterial disease

\* Per 1 standard deviation increase

Model 1 includes adjustment for age, sex, race, ethnicity, level of education, and clinical center

Model 2 includes adjustment for variables in Model 1 plus body mass index, waist circumference, smoking status, systolic BP, ACEi/ARB use, HDL, LDL, triglycerides, high sensitivity CRP, fat-free mass, eGFR, hemoglobin, physical activity

Model 3 includes adjustment for variables in Model 2 plus use of statins, use of other lipid-lowering medications, history of CVD, 24-hr urine protein, FGF-23, uric acid, serum albumin

**Table S2. Multivariable-adjusted hazard ratios of atherosclerotic cardiovascular composite endpoints per 1 SD increase in HOMA-IR and other markers of carbohydrate metabolism among CRIC participants without diabetes at baseline modeling death as a competing event.**

|                                                                      | Model 1 |           | Model 2 |           | Model 3 |           |
|----------------------------------------------------------------------|---------|-----------|---------|-----------|---------|-----------|
|                                                                      | HR*     | 95% CI    | HR*     | 95% CI    | HR*     | 95% CI    |
| <i>Event: Composite Atherosclerotic CVD Endpoint (MI/PAD/stroke)</i> |         |           |         |           |         |           |
| HOMA-IR                                                              | 1.04    | 0.91-1.20 | 1.04    | 0.89-1.23 | 1.02    | 0.85-1.21 |
| Glucose                                                              | 1.05    | 0.92-1.20 | 1.07    | 0.91-1.25 | 1.07    | 0.91-1.26 |
| HbA1c                                                                | 1.23    | 1.07-1.41 | 1.23    | 1.06-1.43 | 1.18    | 1.01-1.39 |
| C-peptide                                                            | 1.14    | 1.00-1.30 | 1.08    | 0.91-1.29 | 1.01    | 0.85-1.26 |

Abbreviations: CI – confidence interval; CRP – C-reactive protein; CVD – cardiovascular disease; HbA1c – glycosylated hemoglobin; HOMA-IR – homeostasis model assessment insulin resistance; HR – hazard ratio; MI – myocardial infarction; PAD – peripheral arterial disease

\* Per 1 standard deviation increase

Model 1 includes adjustment for age, sex, race, ethnicity, level of education, and clinical center

Model 2 includes adjustment for variables in Model 1 plus body mass index, waist circumference, smoking status, systolic BP, ACEi/ARB use, HDL, LDL, triglycerides, high sensitivity CRP, fat-free mass, eGFR, hemoglobin, physical activity

Model 3 includes adjustment for variables in Model 2 plus use of statins, use of other lipid-lowering medications, history of CVD, 24-hr urine protein, FGF-23, uric acid, serum albumin
